# Supplementary material for: A Versatile Axle for the Construction of Disassemblage Rotaxanes
Source: MDPI journal article supplement (doi:10.3390/molecules21081043), 2016-08-10
Supplement: s1 [file s1]

## Supplementary Materials: A Versatile Axle for the Construction of Disassembly Rotaxanes

Lucas A. Powers and David B. Smithrud

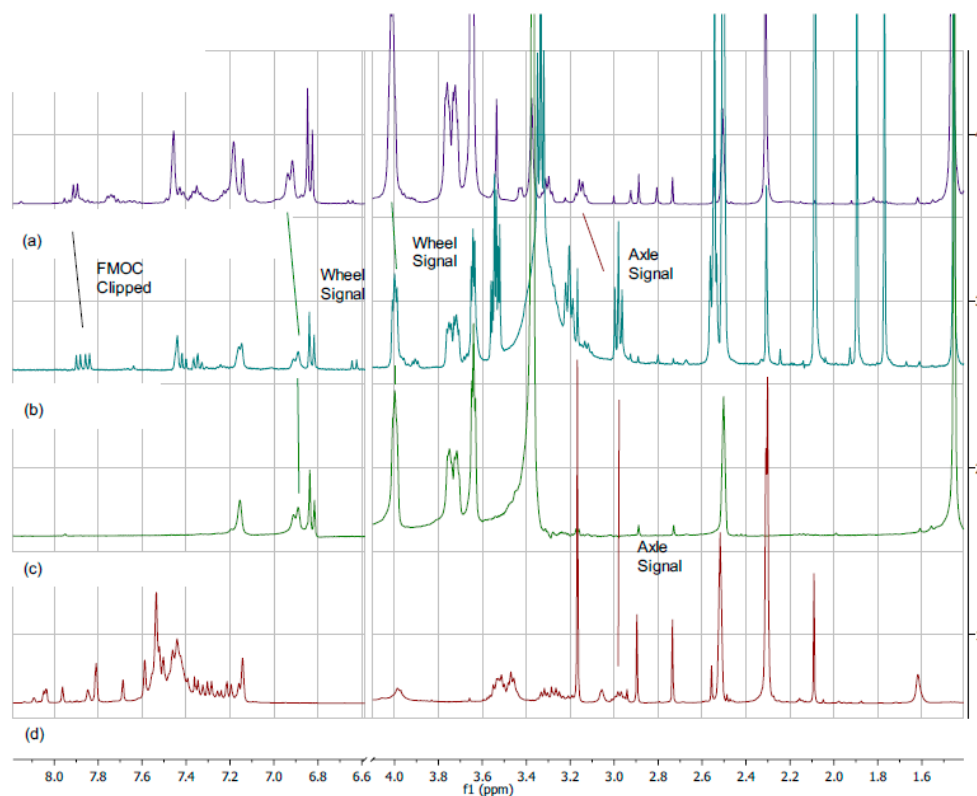

**Figure S1.** Example of the disassembly of Fmoc-R1 caused by the presence of piperidine. (a) Fmoc-R1 (2 mM) in DMSO- $d_6$ , (b) the same solution as (a) with the addition of ethanolamine (1% *v/v*) after approximately 5 minutes. Disassembly is evident with the chemical shifts of the wheel and blocked-axle 7 more closely matching the chemical shifts of the pure wheel and blocked-axle 7 (c,d), respectively.
